# Supplementary material for: Scope and Predictive Genetic/Phenotypic Signatures of Bicarbonate (NaHCO3) Responsiveness and β-Lactam Sensitization in Methicillin-Resistant Staphylococcus aureus
Source: PubMed Central journal article supplement (PMC7179597; doi:10.1128/aac.02445-19), 2020-04-21
Supplement: AAC.02445-19-s0001.pdf [file AAC.02445-19-s0001.pdf]

**Figure S1**

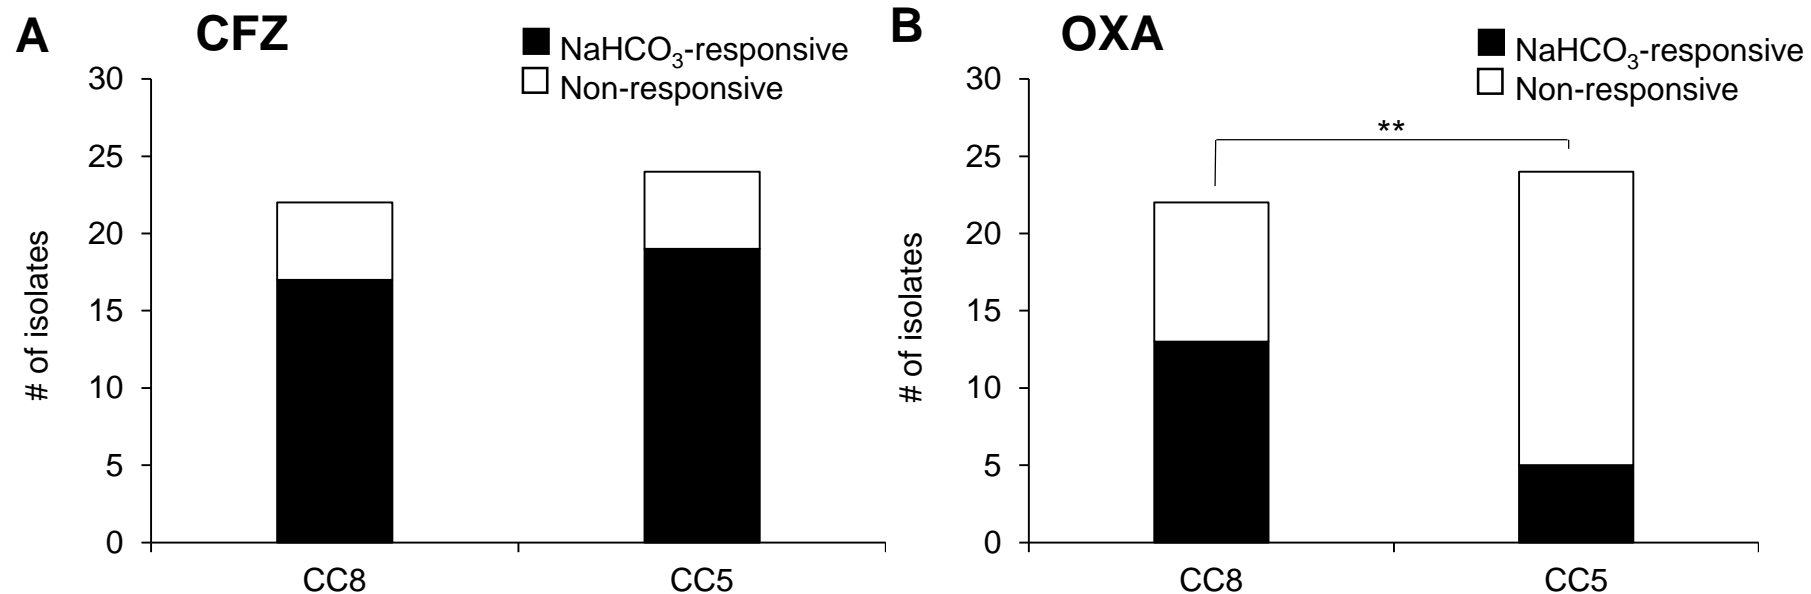

**FIG S1.** Relationship between CC types and responsiveness to CFZ and OXA. **(A)** Frequency of NaHCO<sub>3</sub>-responsiveness to CFZ within the two most common CC types in cohort (CC8 and CC5). Neither CC8 nor CC5 was a better predictor of responsiveness to CFZ (Chi-squared analysis,  $P = 0.2$ ). **(B)** Frequency of NaHCO<sub>3</sub>-responsiveness to OXA within CC8 and CC5. CC8 was a better predictor of responsiveness to OXA than CC5 (Chi-squared analysis,  $**P = 0.008$ ).
